# Supplementary material
Source: PubMed Central journal article supplement (PMC5589134)
Supplement: NIHMS821761-supplement-1.pdf [file NIHMS821761-supplement-1.pdf]

**Expectation of Side Effects of Therapies**

Patient Initials:    Patient # - Visit #:       Date:   /   /

**Chamomile:**

Each individual may have a different expectation for the side effects of **chamomile**. If we use the following sentences to describe **your expectation** of the side effects associated with the entire course of **chamomile** therapy, how much do you **agree**?

For each statement, please pick the closest answer by filling in the circle:

|                                                                                     | Not at all<br>Agree   | A Little<br>Agree     | Moderately<br>Agree   | Mostly<br>Agree       | Completely<br>Agree   |
|-------------------------------------------------------------------------------------|-----------------------|-----------------------|-----------------------|-----------------------|-----------------------|
| 1. I am not likely to experience any side effects.                                  | <input type="radio"/> |
| 2. I am prone to side effects of this type of therapy.                              | <input type="radio"/> |
| 3. If anyone will have side effect to this therapy,<br>that will be me.             | <input type="radio"/> |
| 4. Compared to others, I am more likely to develop<br>side effects to this therapy. | <input type="radio"/> |
