# Supplementary material
Source: PubMed Central journal article supplement (PMC5589134)
Supplement: NIHMS821761-supplement-2.pdf [file NIHMS821761-supplement-2.pdf]

# Long-Term Chamomile Therapy of Generalized Anxiety Disorder

## Expectation for Therapeutic Effects (ETE)

Patient Initials:  Patient # - Visit #:  -  Date:  /  /

### Chamomile:

Each individual may have a different expectation for the effects of chamomile. If we use the following sentences to describe **your expectation** of **chamomile's** effect on your **anxiety** after the entire course of herbal therapy, how much do you **agree**?

For each statement, please pick the closest the answer by filling in the circle:

|                                                   | Not at all<br>Agree   | A Little<br>Agree     | Moderately<br>Agree   | Mostly<br>Agree       | Completely<br>Agree   |
|---------------------------------------------------|-----------------------|-----------------------|-----------------------|-----------------------|-----------------------|
| 1. My anxiety will improve a lot.                 | <input type="radio"/> |
| 2. I will be able to cope with my anxiety better. | <input type="radio"/> |
| 3. The symptoms of my anxiety will disappear.     | <input type="radio"/> |
| 4. My energy level will increase.                 | <input type="radio"/> |
